# Supplementary material for: EGF receptor modulates HEV entry in human hepatocytes
Source: PubMed Central journal article supplement (PMC10187617; doi:10.1097/hep.0000000000000308), 2023-02-07
Supplement: hep-77-2104-s001.pdf [file hep-77-2104-s001.pdf]

1 **Supplementary Information – HEP-22-1113**

2 **Epidermal Growth Factor Receptor Modulates Hepatitis E Virus Entry in Human Hepatocytes**

3

4 Jil Alexandra Schrader<sup>1</sup>, Thomas Leon Burkard<sup>1</sup>, Yannick Brüggemann<sup>1</sup>, André Gömer<sup>1</sup>, Toni Luise  
5 Meister<sup>1</sup>, Rebecca Menhua Fu<sup>2,3</sup>, Ann-Kathrin Mehnert<sup>2,3</sup>, Viet Loan Dao Thi<sup>2,4</sup>, Patrick Behrendt<sup>5,6,7</sup>,  
6 David Durantel<sup>8</sup>, Ruth Broering<sup>9</sup>, Florian W. R. Vondran<sup>10</sup>, Daniel Todt<sup>1,11</sup>, Volker Kinast<sup>1,12#</sup>, Eike  
7 Steinmann<sup>1,113#</sup>

8

9 <sup>1</sup> Ruhr University Bochum, Institute for Hygiene and Microbiology, Department for Molecular and  
10 Medical Virology, Bochum, Germany

11 <sup>2</sup> Schaller Research Group at Department of Infectious Diseases and Virology, Heidelberg University  
12 Hospital, Cluster of Excellence CellNetworks, Heidelberg, Germany

13 <sup>3</sup> Heidelberg Biosciences International Graduate School, Heidelberg University, Heidelberg, Germany

14 <sup>4</sup> German Centre for Infection Research (DZIF), Partner Site Heidelberg, Heidelberg, Germany

15 <sup>5</sup> TWINCORE Centre for Experimental and Clinical Infection Research, a Joint Venture between the  
16 Medical School Hannover (MHH) and the Helmholtz Centre for Infection Research (HZI), Institute  
17 for Experimental Virology, Hannover, Germany

18 <sup>6</sup> Hannover Medical School, Department of Gastroenterology, Hepatology and Endocrinology,  
19 Hannover, Germany

20 <sup>7</sup> German Centre for Infection Research (DZIF), Partner Site Hannover - Braunschweig, Hannover,  
21 Germany

22 <sup>8</sup> CIRI - Centre International de Recherche en Infectiologie, Univ Lyon, Université Claude Bernard  
23 Lyon 1, Inserm, U1111, CNRS, UMR5308, ENS Lyon, Lyon, 69007, France.

24 <sup>9</sup> University Hospital Essen, University Duisburg-Essen, Department of Gastroenterology, Hepatology  
25 and Transplant Medicine, Essen, Germany

26 <sup>10</sup> Hannover Medical School, Department of General, Visceral and Transplant Surgery, Hannover,  
27 Germany;

- 28 <sup>11</sup> European Virus Bioinformatics Centre (EVBC), Jena, Germany
- 29 <sup>12</sup> Carl von Ossietzky University Oldenburg, Department of Medical Microbiology and Virology,  
30 Oldenburg, Germany
- 31 <sup>13</sup> German Centre for Infection Research (DZIF), External Partner Site, Bochum, Germany

## 32 **Material and Methods**

### 33 *Hepatocyte-Like Cells (HLCs)*

34 Hepatocyte-like cells were made from induced pluripotent stem cells (iPSCs) as described previously<sup>1</sup>  
35 and plated for differentiation on a 48-well plate.

36

### 37 *Production of Ectopically Expressing Cell Lines via Lentiviral Transduction*

38 For the production of lentiviral particles,  $8 \times 10^5$  293T cells were seeded on collagen-coated 6-well  
39 plates. The following day, the 293T cells were transfected with the plasmids pcz-VSV-G, pCMV-  
40 dR8.74 and pWPI-BLR with the respective gene of interest using Lipofectamine 2000 (Invitrogen, Cat.  
41 Nr. 11668019) following the manufacturer's instructions. Six hours post transfection, a medium change  
42 was done and the lentiviral particles were harvested 48 h and 72 h post transfection by collecting the  
43 supernatant and filtering it through a 0.45  $\mu\text{m}$  mesh (Filtropur 0.45, Sarstedt, Cat. Nr. 83.1826) to  
44 remove any cell debris.  $1 \times 10^5$  target cells (HepG2) per well were seeded on a 6-well plate prior to  
45 treatment with 4  $\mu\text{g}/\text{mL}$  polybrene (Sigma-Aldrich, Cat. Nr. TR-1003) and infection with 1 mL of  
46 lentiviral particles for 6–8 h. Selection of the transduced cells was started 48 h post transduction using  
47 5  $\mu\text{g}/\text{mL}$  blasticidin-S-hydrochlorid (Fisher Bioreagents, Cat. Nr. BP2647) and further maintained in  
48 DMEM complete containing blasticidin-S-hydrochlorid. Validation of the ectopic expression was done  
49 via western blot and immunofluorescence staining.

50

### 51 *siRNA-Mediated Knock Down*

52 Knock down of endogenously expressed EGFR was performed using two validated short interfering  
53 RNAs (siRNA, Ambion, ID s564 and s565, Cat. Nr. 4427038) and a control siRNA (Ambion, Silencer  
54 Select, Cat. Nr. 4390843). 0.5  $\mu\text{M}$  each of the siRNA were transfected using Lipofectamine RNAiMax  
55 (Invitrogen, Cat. Nr. 13778) following the manufacturer's instructions. Two days post transfection, the  
56 cells were either subjected to infection assays or lysed for western blot analysis.

57

58

### 59 *shRNA-Induced Knock Down via Adeno-Associated Viral (AAV) Transduction*

60 The sequence of the shRNA targeting EGFR was obtained from Rothenberg *et al.*<sup>2</sup>(sequence of  
61 shEGFR: GCTGGATGATAGACGCAGATA, sequence of shCtrl:  
62 GGTCGTGAACTAATCAGAGGA). The forward strand oligonucleotides were designed by starting  
63 with a 5' CACC overhang for cloning using BsmBI, followed by the sense sequence, a connecting 7 nt  
64 loop (TCAAGAG) sequence and finally the antisense sequence (targeting sequence). The reverse strand  
65 was designed using a 5' AAAA overhang. The shRNA genes were cloned into a self-complementary  
66 AAV6 vector under the U6 promoter. Iodixanol purified and recombinant AAVs were produced as  
67 described previously<sup>3</sup>. HLCs were transduced with AAVs three days prior to HEV infection. The  
68 inoculum was removed 24 h post transduction. The cells washed once with PBS and fresh HLC culture  
69 medium renewed.

70

### 71 *In Vitro Transcription and Electroporation*

72 Before *in vitro* transcription, HEV Kernow-C1-p6-full length and -Gluc plasmid were linearized using  
73 MluI (New England Biolabs, Cat. Nr. R3198), while HEV 83-2-containing plasmids were linearized  
74 with HindIII (New England Biolabs, Cat. Nr. R3104). *In vitro* transcribed RNA (IVTs) were produced  
75 as described in Todt *et al.*<sup>4</sup>. IVTs were subsequently transfected into the respective cells using the  
76 electroporation technique described in<sup>4</sup>. Shortly, 5 µg of *in vitro* transcribed RNA were mixed with  
77  $5 \times 10^6$  cells in 400 µL cytomix containing 2 mM ATP (Cayman Chemical, Cat. Nr. 14498) and 5 mM  
78 glutathione (Sigma Aldrich, Cat. Nr. # G4251). After electroporation using the Gene Pulser system  
79 (Bio-Rad), cells were immediately transferred to 12.1 mL of DMEM complete and the cell suspension  
80 was seeded in respective plates depending on the experiment ( $2 \times 10^4$  cells/well seeded in a 96-well plate  
81 for luciferase assays, 12.5 mL seeded in a 10 cm dish for virus production).

82

### 83 *Production of Cell Culture-Derived HEV Particles (HEV<sub>CC</sub>)*

84 HEV<sub>CC</sub> (p6 and 83-2) was produced as previously described<sup>4</sup>. In brief, HEV IVTs were electroporated  
85 into HepG2 cells. Seven days post electroporation, the supernatant containing enveloped HEV<sub>CC</sub> was  
86 filtered through a 0.45 µm mesh (Filtropur 0.45, Sarstedt, Cat. Nr. 83.1826) and stored at 4 °C for up

87 to 7 days. To harvest non-enveloped HEVcc, the cells were trypsinized, resuspended in fresh DMEM  
88 complete and lysed via three freeze-thaw cycles in liquid nitrogen. The lysate was cleared from cell  
89 debris by a 10 000×g centrifugation for 10 min and titrated on HepG2/C3A cells to determine viral  
90 titers. Non-enveloped HEVcc was frozen at  $-80^{\circ}\text{C}$  until further usage. Cells were fixed with 3%  
91 paraformaldehyde (PFA, Roth, Cat. Nr. 93351) seven days post infection for immunofluorescence  
92 staining against ORF2 protein and determination of the number of focus forming units (FFU) according  
93 to Todt et al. <sup>4</sup>.

94

#### 95 *HEV Infection Assays with Non-Enveloped HEVcc*

96 For infection assays, either  $3.5 \times 10^3$  HepG2(-derived) cells were seeded on collagen-coated 96-well  
97 plates, or differentiated HepaRG cells (24-well plate) or PHHs seeded at  $5 \times 10^5$  cells/well were used  
98 (see section *cell culture*). The following day, cells were infected with a multiplicity of infection (MOI)  
99 of 0.5–2 or  $1 \times 10^5$  FFU per well (HLC). Erlotinib (33  $\mu\text{M}$ , MedChemExpress, Cat. Nr. HY-50896), EGF  
100 (16.5 nM, 100 ng/mL, MedChemExpress, Cat. Nr. HY-P7109), Cetuximab (34 nM, MedChemExpress,  
101 Cat. Nr. HY-P9905) and Ribavirin (50  $\mu\text{M}$ , Sigma-Aldrich, Cat. Nr. R9644) were applied  
102 simultaneously to virus inoculum. A medium change of infected PHHs was performed 16 h post  
103 infection (p.i.) to fresh William's medium E with supplements for PHHs, Rbv was reapplied. The  
104 medium was changed of infected HLCs at 24 h p.i.. PHHs were fixed 3 d p.i. with 3% PFA and HLCs  
105 7 d p.i. while other assays were fixed 5 d p.i. for immunofluorescence staining of ORF2 protein and  
106 determination of FFUs/well or % ORF2 protein positive cells/image section.

107

#### 108 *HEV Infection Assays with Enveloped HEVcc*

109 For infection assays using enveloped HEVcc, either  $1 \times 10^4$  HepG2/C3A cells were seeded on collagen-  
110 coated 96-well plates one day prior to infection with 200  $\mu\text{L}$ /well of enveloped HEVcc (MOI 0.02–  
111 0.05). The inoculum was removed 24 h p.i. and fresh MEM complete supplied. The indicated  
112 modulators were applied in the inoculum at the time of infection as well as renewed and applied into  
113 the fresh MEM complete after the medium change. Cells were fixed 5 d p.i. or immunofluorescence  
114 staining of ORF2 protein and determination of FFUs/well.

115 *HEV Attachment Assay*

116 For attachment assays,  $1 \times 10^4$  HepG2/C3A cells were seeded on collagen-coated 96-well plates. The  
117 following day, the cells were pretreated with EGFR modulators for 30 min at 37 °C and the plate then  
118 put on ice for 30 min before addition of ice-cold non-enveloped HEVcc(p6) (MOI 1–2) and the tested  
119 modulator and incubation for another 2 h on ice. Afterwards, the medium was removed and the cells  
120 washed thrice with ice-cold PBS before either the RNA was isolated for qPCR analysis using the RNasy  
121 Mini Kit (Qiagen, Cat. Nr. 74104) following manufacturer's instructions or the cells were supplied with  
122 fresh MEM complete and incubated for 5 days at 37 °C in a 5% (v/v) CO<sub>2</sub> incubator. The cells were  
123 then fixed with 3% PFA and subjected to an immunofluorescence staining of ORF2 protein and  
124 determination of FFUs/well as described below.

125

126 *HEV Postbinding Assay*

127 For postbinding assays,  $1 \times 10^4$  HepG2/C3A cells were seeded on collagen-coated 96-well plates. The  
128 following day, the plate was incubated on ice for 30 min prior to infection with non-enveloped HEVcc  
129 p6 (MOI 0.5–2) on ice. The inoculum was left on the cells on ice for 2 h before removal. The cells were  
130 washed thrice with ice-cold PBS and fresh medium supplied with the respective modulator was added  
131 and the cells incubated at 37 °C in a 5% (v/v) CO<sub>2</sub> incubator for either 8 h or 3 days. The medium was  
132 changed at the indicated time and the cells washed with PBS thrice and fresh medium without  
133 modulators was added. The cells were then incubated at 37 °C in a 5% (v/v) CO<sub>2</sub> incubator until fixation  
134 3 d p.i. with 3% PFA and subjected to an immunofluorescence staining of ORF2 protein and  
135 determination of FFUs/well as described below.

136

137 *HEV Entry Assay*

138 For entry assays,  $3.5 \times 10^3$  HepG2(-derived) cells were seeded on collagen-coated 96-well plates. The  
139 following day, cells were pretreated for 30 min with the respective modulator before infection with non-  
140 enveloped HEVcc (MOI 0.5–2) for 6–8 h. Medium was removed and fresh DMEM complete with  
141 neither virus nor modulator was added except for ribavirin (Rbv), which was added into the fresh

142 medium again. Cells were incubated for 5 d p.i. before fixation with 3% PFA, immunofluorescence  
143 staining of ORF2 protein and determination of FFUs/well as described below.

144

#### 145 *HEV Luciferase Replication Assays*

146 HEV replication was monitored using a *Gaussia* luciferase (Gluc) construct replacing the ORF2 in the  
147 HEV Kernow-C1-p6 genome<sup>5</sup>. In order to measure the luciferase activity, the respective cells were  
148 electroporated with HEV Kernow-p6-Gluc IVTs. 20 µL of the supernatant were collected at the  
149 indicated hours post electroporation (h p.e.) and transferred to a white, flat-bottom microplate (Greiner  
150 Bio-One, Cat. Nr. 655074). The supernatant was subsequently incubated with luciferase substrate  
151 (1 µmol/L of coelenterazin in PBS, Carl Roth, Cat. Nr. 4094.3) and luciferase activity was measured in  
152 a luminometer (CentroXS3 LB960, Berthold technologies).

153

#### 154 *RT-qPCR*

155 HEV RNA was quantified using a TaqMan® probe (5'-6FAM-TGATTCTCAGCCCTTCGC-BBQ-3')  
156 one step RT-qPCR based on the GoTaq® Probe 1-Step RT-qPCR System (Promega). 50 ng of isolated  
157 RNA were used as template and 5'-GGTGGTTTCTGGGGTGAC-3' (sense) and 5'-  
158 AGGGGTTGGTTGGATGAA-3' (antisense) as HEV primers were utilized<sup>6</sup>. An RNA transcript served  
159 as a standard to quantify RNA copy numbers by serial dilution<sup>4</sup>. All RT-qPCR were run on a  
160 LightCycler 480 system (Roche).

161

#### 162 *Immunofluorescence Staining and Microscopy*

163 Cells were fixed by applying 3% PFA for at least 10 min followed by permeabilization in 0.1% Triton  
164 X-100 (Carl Roth, Cat. Nr. 3051.3) in 1× PBS for 5 min. Subsequently, the cells were blocked in 5%  
165 horse serum (Gibco, Cat. Nr. 26050-088) in 1× PBS for a minimum of 1 h. EGFR expression was  
166 stained with a polyclonal goat antibody (R and D Systems, Cat. Nr. AF231, 1:500 in 5% horse-serum),  
167 EGFR phosphorylation at Tyr1068 was visualized with monoclonal rabbit antibody (Cell Signaling  
168 Technology, Cat. Nr. 3777S, 1:200 in 5 % horse-serum), for staining of albumin polyclonal anti-rabbit  
169 antibody (Agilent, Cat. Nr. A0001, 1:500 in 5% horse-serum) was used, and for the capsid protein

170 (ORF2 protein) a polyclonal HEV genotype 3 capsid protein-specific rabbit hyperimmune serum  
171 (diluted 1:5 000 in 5% horse serum, kindly gifted by Prof. Rainer G. Ulrich, Friedrich Loeffler Institute,  
172 Germany <sup>7</sup>) was used and cells with the respective antibody incubated at 4 °C on a rocking shaker  
173 overnight. Unbound primary antibody was removed by washing twice with 1× PBS and the secondary  
174 antibody (goat anti-rabbit AlexaFluor 488 or rabbit-anti-goat AlexaFluor 488, 1:1 000 in 5% horse  
175 serum, Invitrogen, Cat Nr. A-11008 and A-11078, respectively) was added. After 2 h in the dark on a  
176 rocking shaker, the cells were washed twice with 1× PBS and the DNA labelled with either 4',6'-  
177 diamidino-2-phenylindole (Invitrogen, Cat. Nr. D1306, DAPI, 1:10,000 in H<sub>2</sub>O) for 5 min or  
178 Hoechst 33342 (Thermo Fisher Scientific, 1:1000 in H<sub>2</sub>O). Afterwards, the cells were washed twice  
179 with water and stored in water at 4 °C until imaging. All staining steps were performed at room  
180 temperature unless otherwise stated. Images of fluorescently stained cells were taken with a Keyence  
181 BZX800 microscope with 4×, 10× or 20× objectives or with the Zeiss Cell discoverer 7 (CD7)  
182 microscope.

183

#### 184 *Western Blots*

185 For western blot analysis, cells were lysed in either M-Per buffer (Thermo Scientific, Cat. Nr. 78501)  
186 supplemented with Pierce Protease Inhibitor Mix (Thermo Scientific, Cat. Nr. A32953) or RIPA buffer  
187 containing the cOmplete Mini Protease Inhibitor Cocktail (Roche). Cells were centrifuged at 10 000×g  
188 for 15 min, the supernatant then heated at 95°C for 5 min with 1× Laemmli-Buffer and resolved by  
189 SDS-PAGE before being transferred to either nitrocellulose or polyvinylidene fluoride (PVDF)  
190 membranes by wet tank electroblotting. Membranes were blocked with 5% milk in PBS containing  
191 0.05% Tween (PBS-T) for min. 1 h at room temperature and subsequently incubated with primary rabbit  
192 monoclonal anti-EGFR antibody (Cell Signaling Technologies, Cat. Nr. 4267S, 1:1000 in 0.5% milk),  
193 overnight at 4 °C, followed by incubation with secondary horseradish peroxidase (HRP) conjugated  
194 polyclonal goat anti-rabbit antibody (Abcam, Cat. Nr. #ab97051, 1:10 000 or Jackson Immuno Reseach,  
195 1:4 000, in 0.5% milk) for 2 h at room temperature. The primary antibody targeting  $\beta$ -actin (Sigma-  
196 Aldrich, Cat. Nr. A3854, 1:10 000 in 0.5% milk,) was already conjugated with HRP and was thus  
197 incubated for 2 h after blocking. Subsequently, membranes were developed using the Pierce ECL



198 Western Blotting Substrate (Thermo Scientific, 32109) and analyzed using a chemiluminescence  
199 imaging machine (Celvin S 420, Biostep Sarstedt, or INTASELL Chemostar imager).

200

#### 201 *Cell Viability Assay*

202 To determine the cell viability upon treatment with the different drugs, an MTT (3-(4,5-dimethylthiazol-  
203 2-yl)-2,5-diphenyltetrazolium bromide) assays was performed. For this,  $2.5 \times 10^4$  HepG2 cells were  
204 seeded on collagen-coated 96-well plates. The following day, cells were treated with the indicated  
205 amounts of modulator. Three days post treatment, MTT substrate (Biomol, Cat. Nr. 15655) supplied in  
206 DMEM complete medium was added to the cells and incubated at 37 °C in a 5% (v/v) CO<sub>2</sub> incubator  
207 for 2 hours or until cells have metabolized the substrate to MTT formazan. The medium was removed,  
208 50 µL DMSO added to each well and the absorbance photometrically measured at 570 nm using the  
209 Tecan Sunrise Remote plate reader. Cells treated with 70% ethanol served as background control.

210

#### 211 *scRNA Seq*

212 Single-cell RNA Sequencing data was mined from Aizarani et al. <sup>8</sup>. RNA expression was visualized by  
213 T-distributed stochastic neighbor-embedding (t-SNE) plots via the human liver cell atlas webservice  
214 (<http://human-liver-cell-atlas.ie-freiburg.mpg.de/>). Violin plots were computed with in-house R script  
215 using the following packages: SingleCellExperiment, Tidyverse, Scater, Scan.

216

#### 217 *Statistical Analysis and Software*

218 Statistical analysis was performed using GraphPad Prism v9.12 for Windows (La Jolla, CA, USA,  
219 [www.graphpad.com](http://www.graphpad.com)). Dose-dependent treatment was plotted and adjusted to a non-linear regression  
220 mode using GraphPad Prism. To test significance of mean differences, either student t-test or one-way  
221 ANOVA followed by Dunnett's multiple comparison test were used, p values < 0.05 (\*), <0.01 (\*\*),  
222 <0.001 (\*\*\*) and <0.0001 (\*\*\*\*) were considered statistically significant. p values >0.05 were  
223 considered to be non-significant (ns). For image analysis Fiji-ImageJ (v1.53q) <sup>9</sup> and CellProfiler (v.  
224 4.0.7) ([www.cellprofiler.org](http://www.cellprofiler.org)) were used. Graphics were prepared using GraphPad Prism v9.12 for

225 Windows (La Jolla, CA, USA, [www.graphpad.com](http://www.graphpad.com)), Adobe Illustrator v26.0.3 ([www.adobe.com](http://www.adobe.com)) and

226 BioRender ([www.biorender.com](http://www.biorender.com)).

227

228 *Supplementary Tables and Figures*

229

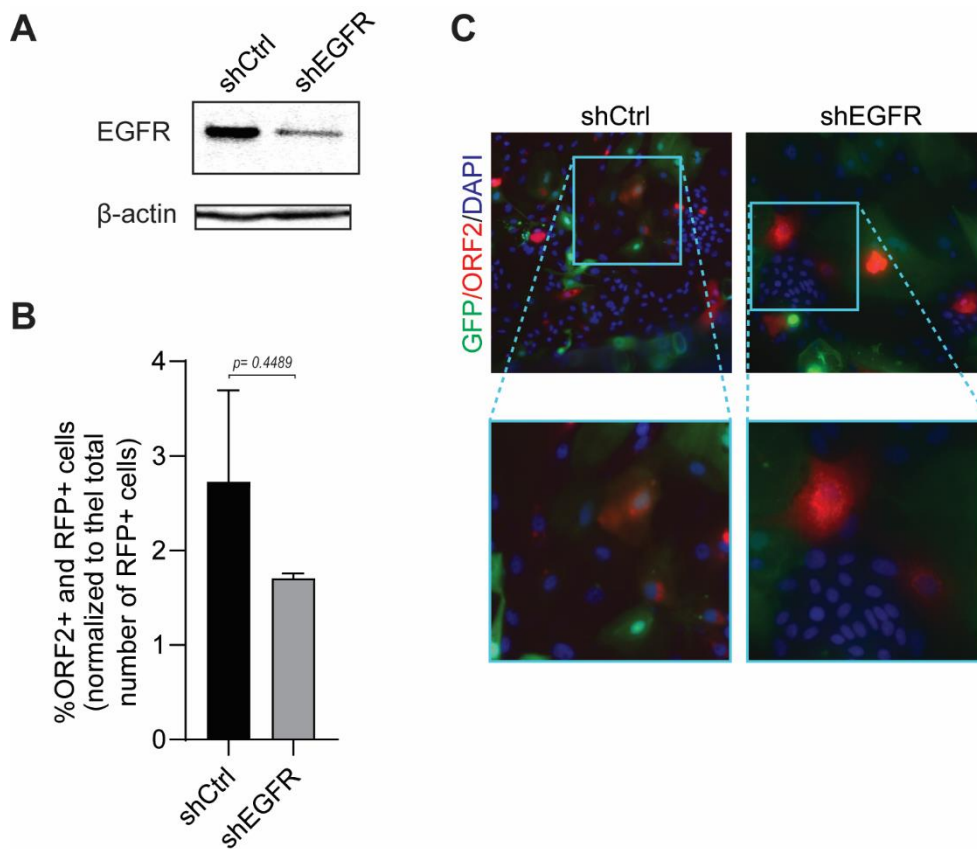

230

231 **Supplementary Figure S1: Knock down of EGFR in HLCs reduces HEV infection.** (A) EGFR  
 232 protein expression in iPSC-derived HLCs 48 h post transduction with AAVs carrying shRNA targeting  
 233 EGFR (shEGFR) or control RNA (shCtrl). (B) Quantification of HEV-infected and shRNA-transduced  
 234 (ORF2+, RFP+) HLCs normalized to the total number of HLCs transduced (RFP+).  
 235  $(\text{ORF2}^+, \text{RFP}^+) / ((\text{ORF2}^+, \text{RFP}^+) + (\text{ORF2}^-, \text{RFP}^+))$ . (C) Representative immunofluorescence  
 236 images stained for ORF2 protein (red). Transduced cells carrying a GFP reporter are indicated in green.  
 237 Infection experiments were performed in duplicates with at least 20 frames counted. Mean and SEM  
 238 are depicted from at least two independent experiments.

239

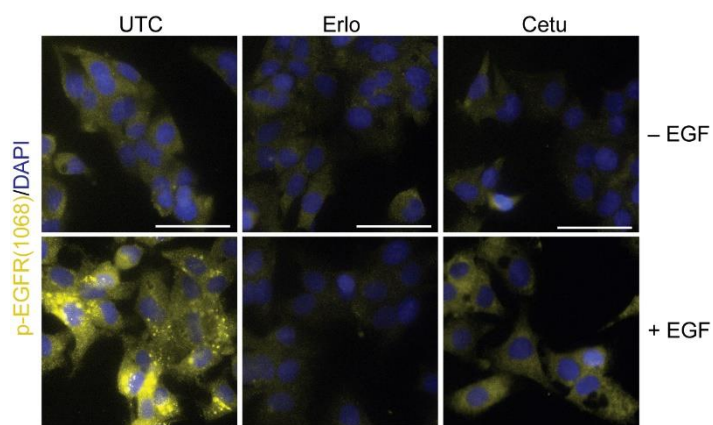

240

241 **Supplementary Figure S2: Erlotinib and Cetuximab inhibit EGF induced phosphorylation of**

242 **EGFR at Tyr1068.** Immunofluorescence analysis of EGFR phosphorylation at Tyr1068 after overnight

243 FCS starvation of EGFR-WT ectopically expressing HepG2 cells and after treatment with Erlotinib

244 (33  $\mu$ M, Erlot), or Cetuximab (34 nM, Cetu) for 30 min prior to challenge with EGF (16.5 nM) for

245 15 min. Scalebars = 100  $\mu$ m.

246

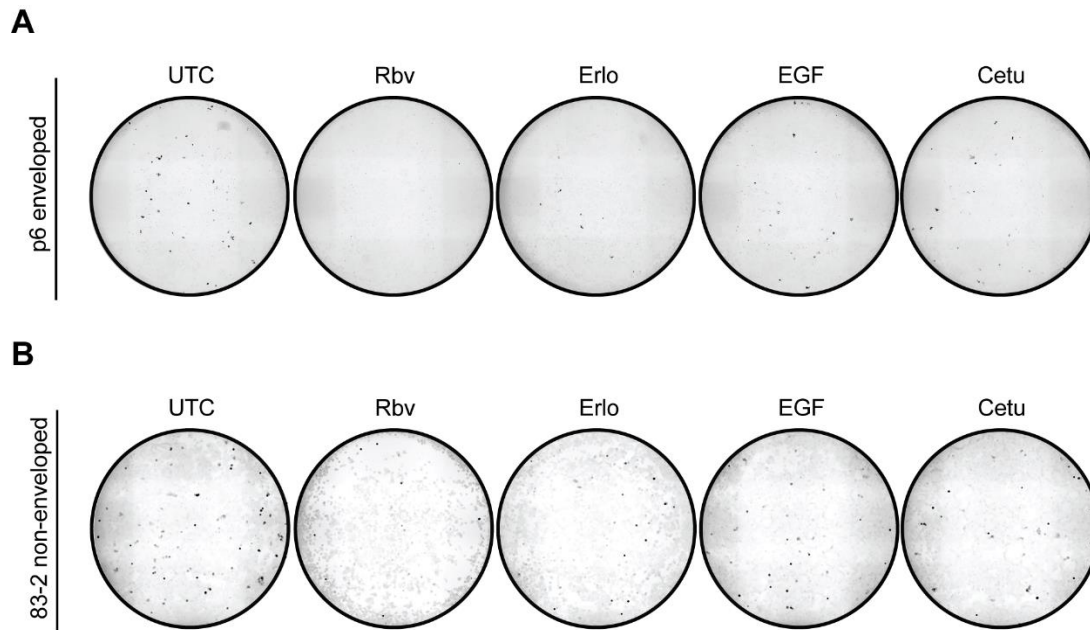

247

248 **Supplementary Figure S3: Endogenous EGFR is critical for HEV infection.** (A) HEVcc p6  
249 enveloped and (B) 83-2 non-enveloped infection in HepG2 cells under treatment of EGFR modulators  
250 Erlotinib (33  $\mu$ M, Erlo), EGF (16.5 nM) and Cetuximab (34 nM, Cetu) compared to untreated control  
251 cells (UTC), while the HEV inhibitor Ribavirin (50  $\mu$ M, Rbv) served as control. HEVcc infected cells  
252 were stained against ORF2 protein (indicated in black) and images taken using the 4x magnification of  
253 the Keyence microscope. Images were stitched and processed using Fiji. Full well images are depicted.

254

255

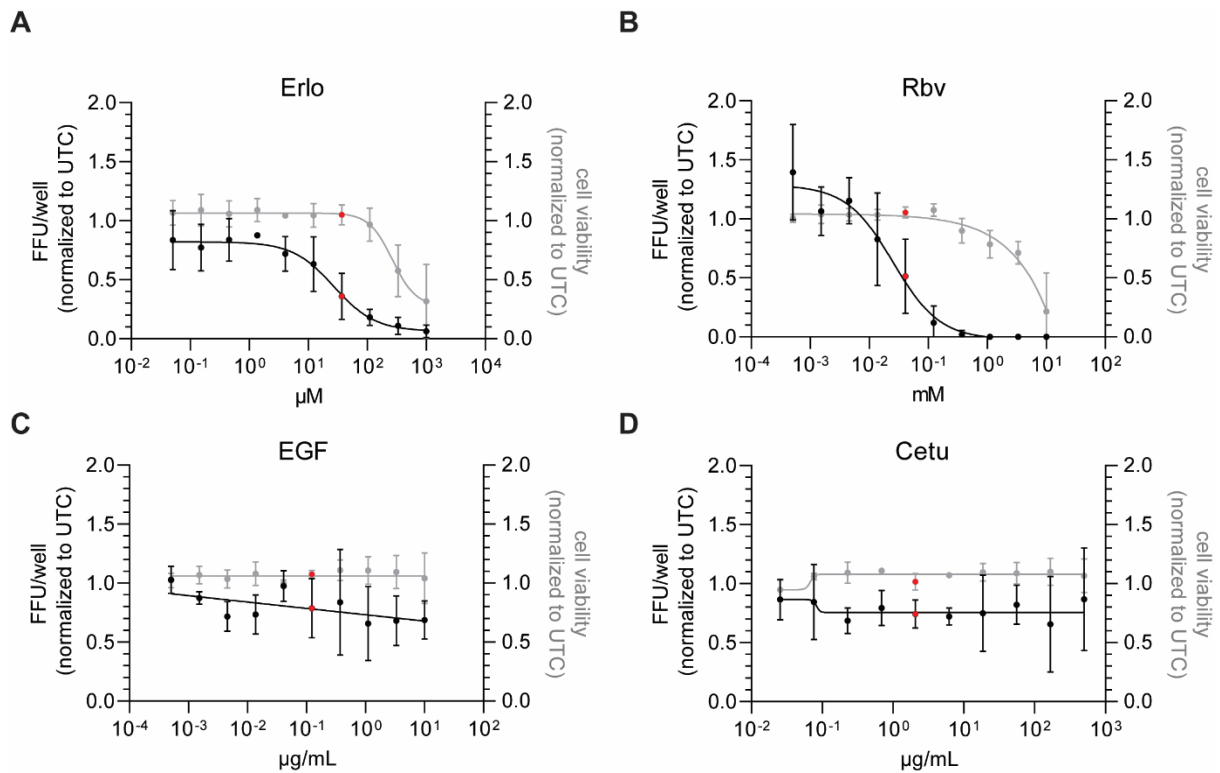

256

257 **Supplementary Figure S4: EGFR kinase inhibitor Erlotinib inhibits HEVcc p6 infection in a dose-**  
 258 **dependent manner.** Infection with HEVcc p6 under simultaneous treatment of (A) Erlotinib (Erlo)  
 259 (B) Ribavirin (Rbv) (C) EGF and (D) Cetuximab (Cetu) with the indicated concentrations fixed at  
 260 3 d p.i.. FFU/wells (black) normalized to untreated cells. Cell viability (grey) measured using an MTT  
 261 Assays at 3 days post treatment and normalized to untreated cells. Indicated in red is the concentration  
 262 used in subsequent infection assays with the specific modulator. All experiments were performed in  
 263 triplicates. Mean and SEM are depicted from three independent experiments. Dose-dependent treatment  
 264 was plotted and adjusted to a non-linear regression model.

265

266

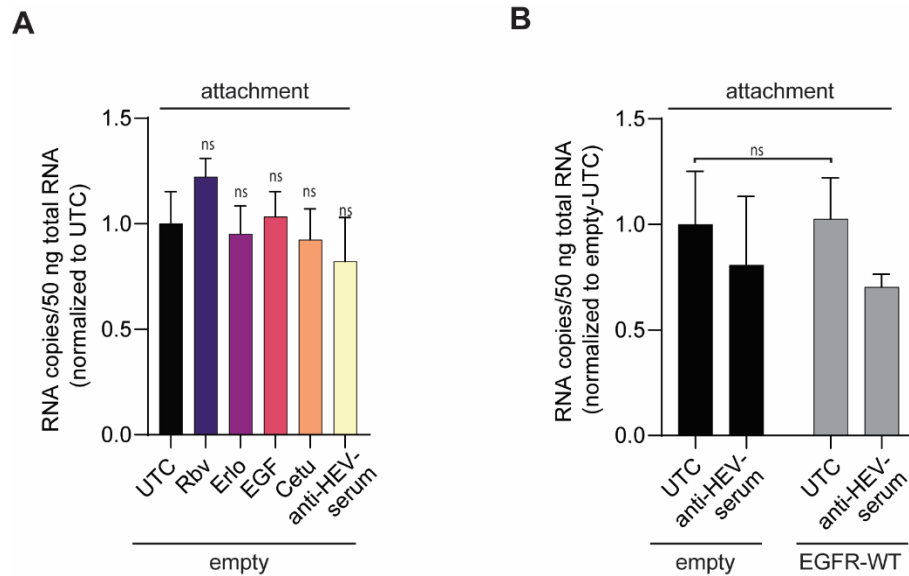

267

268 **Supplementary Figure S5: EGFR does not affect HEV attachment analyzed via qPCR.**

269 Quantification of HEVcc (p6) attachment under EGFR modulator treatment RNA copies/50 ng total

270 RNA isolated and normalized to untreated, infected HepG2/empty cells. (A) HepG2-empty cells were

271 pretreated with EGFR modulators for 30 min at 37 °C before addition of virus for 2 h on ice, allowing

272 attachment but not entry. HEV inhibitor Rbv served as negative control here and anti-HEV serum

273 (1:200) as positive control neutralizing HEVcc (p6). Cells were washed thrice before RNA isolation

274 and quantification of HEV RNA copies. (B) Either HepG2-empty cells or EGFR-WT ectopically

275 expressing HepG2 cells were pretreated with anti-HEV serum for 30 min at 37 °C before addition of

276 virus for 2 h on ice. Cells were washed thrice before RNA isolation and quantification of HEV RNA

277 copies. To test significance of mean differences, student t-test (B) and one-way ANOVA followed by

278 Dunnett's multiple comparison test (A) were used, p values < 0.05 (\*), <0.01 (\*\*), <0.001 (\*\*\*) and

279 <0.0001 (\*\*\*\*), p values >0.05 were considered to be non-significant (ns). All experiments were

280 performed in duplicates. Mean and SEM are depicted from three independent experiments.

281

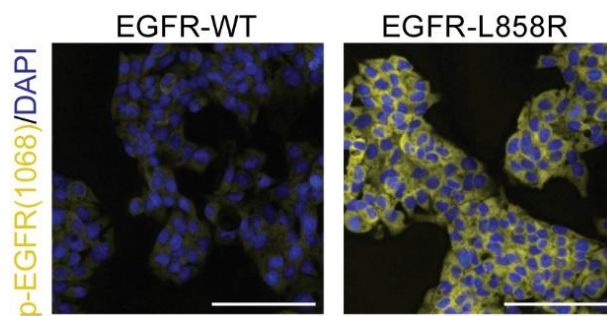

282

283 **Supplementary Figure S6: EGFR-L858R Mutant is constitutively active.** Immunofluorescence  
284 analysis of EGFR phosphorylation at Tyr1068 after overnight FCS starvation of EGFR-WT and  
285 EGFR.L858R ectopically expressing HepG2 cells. Scalebars = 100  $\mu$ m.

286



287

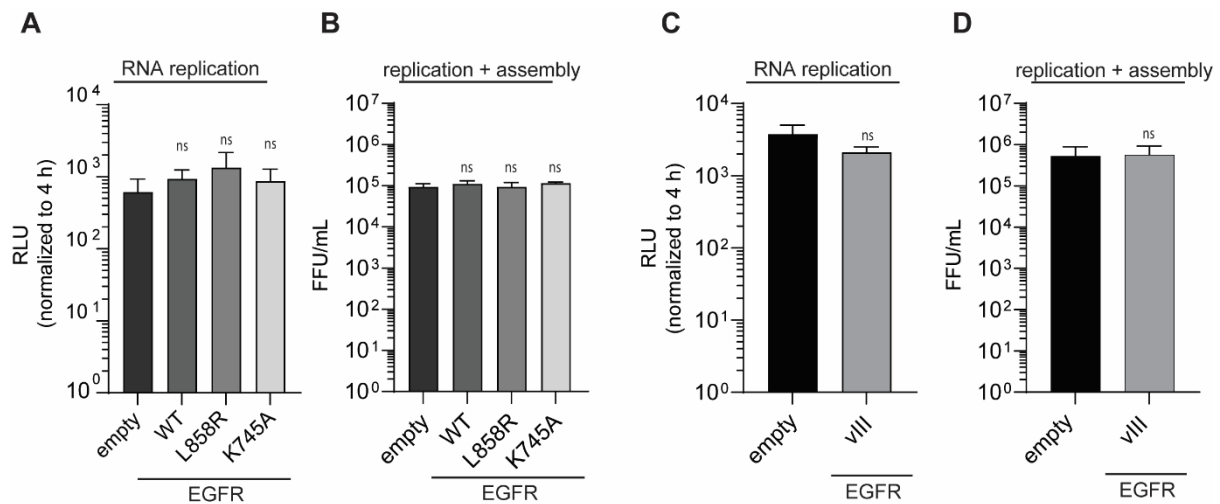

288

289 **Supplementary Figure S7: Mutant EGFR expression does not affect HEV RNA replication nor**  
 290 **production of progeny virus. (A, C) HEV (p6) replication level in RNA subgenomic replicon (SGR)**  
 291 **system 72 h.p.e in mutant EGFR ectopically expressing HepG2 cells normalized to relative light unit**  
 292 **(RLU) levels at 4 h.p.e.. (B, D) Mutant EGFR ectopically expressing HepG2 cells transfected with HEV**  
 293 **Kernow-p6 RNA for virus production. Virus titers determined from non-enveloped virus produced in**  
 294 **mutant EGFR ectopically expressing HepG2 cells. To test significance of mean differences, student t-**  
 295 **test (C and D) and one-way ANOVA followed by Dunnett's multiple comparison test (A and B) were**  
 296 **used, p values < 0.05 (\*), < 0.01 (\*\*), < 0.001 (\*\*\*) and < 0.0001 (\*\*\*\*), p values > 0.05 were considered**  
 297 **to be non-significant (ns). Replication experiments were performed in triplicates (A and C),**  
 298 **determination of viral titers was performed in duplicates (B and D). Mean and SEM are depicted from**  
 299 **three independent experiments.**

300

301

302 **References**

- 303 1. Wu X, Dao Thi VL, Liu P, Takacs CN, Xiang K, Andrus L, et al. Pan-Genotype Hepatitis E  
304 Virus Replication in Stem Cell-Derived Hepatocellular Systems. *Gastroenterology* 2018;154:663-  
305 674.e7; PMID:29277559; <https://doi.org/10.1053/j.gastro.2017.10.041>.
- 306 2. Rothenberg SM, Engelman JA, Le S, Riese DJ, Haber DA, Settleman J. Modeling oncogene  
307 addiction using RNA interference. *Proceedings of the National Academy of Sciences of the*  
308 *United States of America* 2008;105:12480–12484; PMID:18711136;  
309 <https://doi.org/10.1073/pnas.0803217105>.
- 310 3. Zhang C, Freistaedter A, Schmelas C, Gunkel M, Dao Thi VL, Grimm D. An RNA  
311 Interference/Adeno-Associated Virus Vector-Based Combinatorial Gene Therapy Approach  
312 Against Hepatitis E Virus. *Hepatology communications* 2022;6:878–888; PMID:34719133;  
313 <https://doi.org/10.1002/hep4.1842>.
- 314 4. Todt D, Friesland M, Moeller N, Praditya D, Kinast V, Brüggemann Y, et al. Robust hepatitis E  
315 virus infection and transcriptional response in human hepatocytes. *Proceedings of the National*  
316 *Academy of Sciences of the United States of America* 2020;117:1731–1741; PMID:31896581;  
317 <https://doi.org/10.1073/pnas.1912307117>.
- 318 5. Todt D, François C, Anggakusuma, Behrendt P, Engelmann M, Knegendorf L, et al. Antiviral  
319 Activities of Different Interferon Types and Subtypes against Hepatitis E Virus Replication.  
320 *Antimicrobial agents and chemotherapy* 2016;60:2132–2139; PMID:26787701;  
321 <https://doi.org/10.1128/AAC.02427-15>.
- 322 6. Jothikumar N, Cromeans TL, Robertson BH, Meng XJ, Hill VR. A broadly reactive one-step  
323 real-time RT-PCR assay for rapid and sensitive detection of hepatitis E virus. *Journal of*  
324 *virological methods* 2006;131:65–71; PMID:16125257;  
325 <https://doi.org/10.1016/j.jviromet.2005.07.004>.
- 326 7. Behrendt P, Friesland M, Wißmann J-E, Kinast V, Stahl Y, Praditya D, et al. Hepatitis E virus is  
327 highly resistant to alcohol-based disinfectants. *Journal of hepatology* 2022; PMID:35085595;  
328 <https://doi.org/10.1016/j.jhep.2022.01.006>.
- 329 8. Aizarani N, Saviano A, Sagar, Maily L, Durand S, Herman JS, et al. A human liver cell atlas  
330 reveals heterogeneity and epithelial progenitors. *Nature* 2019;572:199–204; PMID:31292543;  
331 <https://doi.org/10.1038/s41586-019-1373-2>.
- 332 9. Schindelin J, Arganda-Carreras I, Frise E, Kaynig V, Longair M, Pietzsch T, et al. Fiji: an open-  
333 source platform for biological-image analysis. *Nature methods* 2012;9:676–682;  
334 PMID:22743772; <https://doi.org/10.1038/nmeth.2019>.
- 335
